# Supplementary material for: Simultaneous and sensitive determination of hydroquinone, catechol, and resorcinol with a palladium nanoparticles/poly(bromocresol green) modified glassy carbon electrode
Source: Royal Society of Chemistry journal article supplement (doi:10.1039/d5ay00511f), 2025-01-01
Supplement: d5ay00511f1.pdf [file d5ay00511f1.pdf]

## Supplementary Information

### Simultaneous and Sensitive Determination of Hydroquinone, Catechol, and Resorcinol with a Palladium Nanoparticles/Poly(Bromocresol Green) Modified Glassy Carbon Electrode

Çağrı Ceylan Koçak <sup>a,\*</sup>

<sup>a</sup> Bergama Vocational School, Dokuz Eylul University, 35700, Izmir, Turkey

\* Correspondence: ceylan.kocak.deu.edu.tr, Tel: +90 (0232) 632 12 47 /115 Fax: +90 (0232) 631 11 10, ORCID: <https://orcid.org/0000-0001-9928-8806>

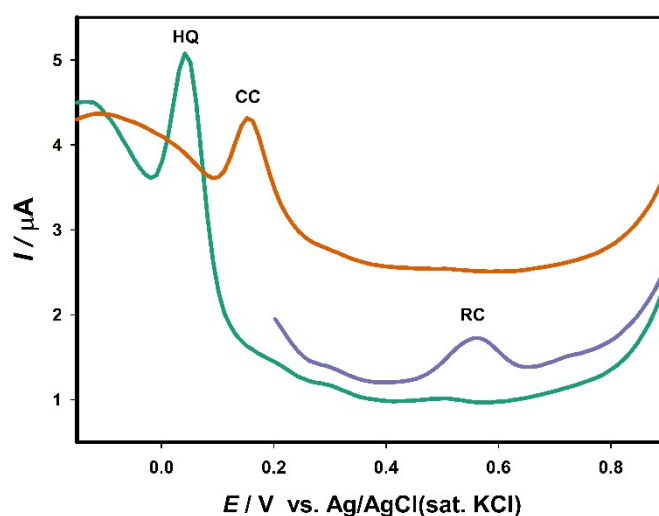

**Figure S1.** Individual DPV responses of Hydroquinone (HQ), Catechol (CC), and Resorcinol (RC).

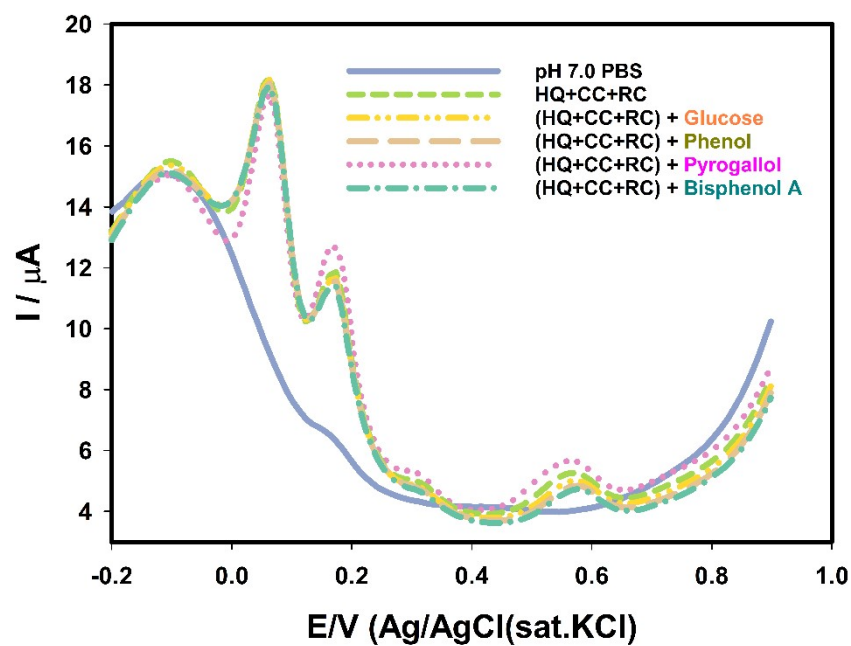

**Figure S2.** DPV responses showing interference study of HQ, CC, and RC with bisphenol A, glucose, pyrogallol, and phenol at five times higher concentrations in PBS.
